# Supplementary material
Source: PubMed Central journal article supplement (PMC5722195)

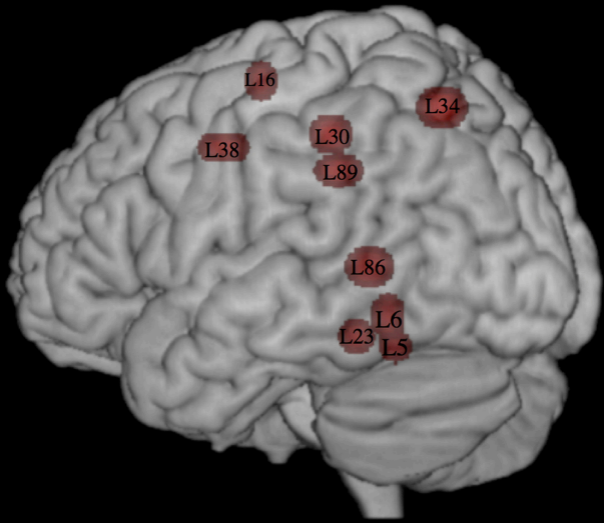

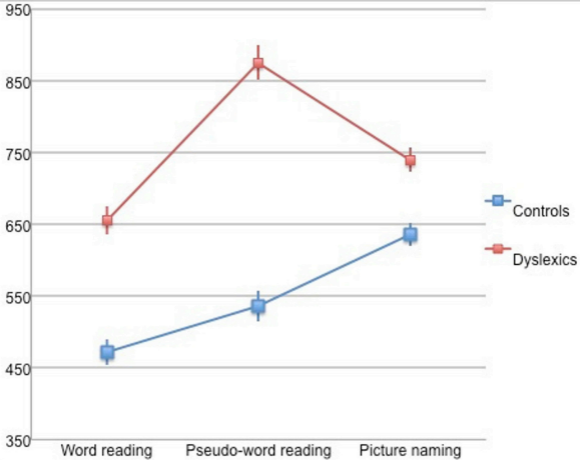

**Normal readers > Dyslexic readers for reading. I-OTC hypoactivation**

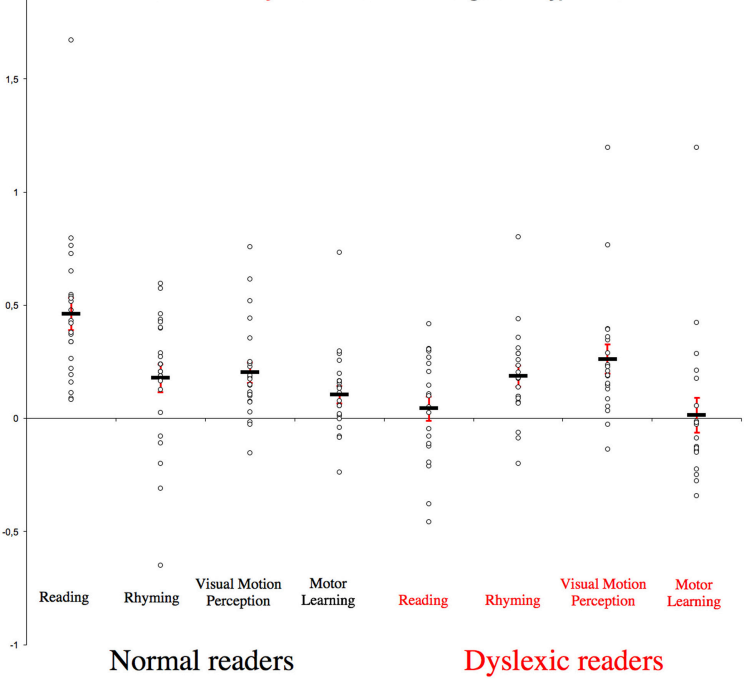

Normal readers

Dyslexic readers

Normal readers > Dyslexic readers for reading. L5 - Fusiform gyrus

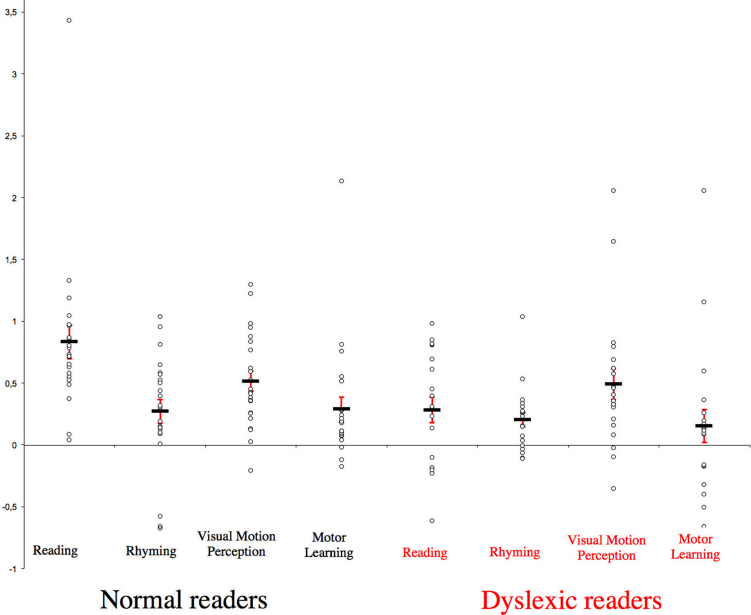

Normal readers > Dyslexic readers for reading. L6 - Inf. temporal gyrus

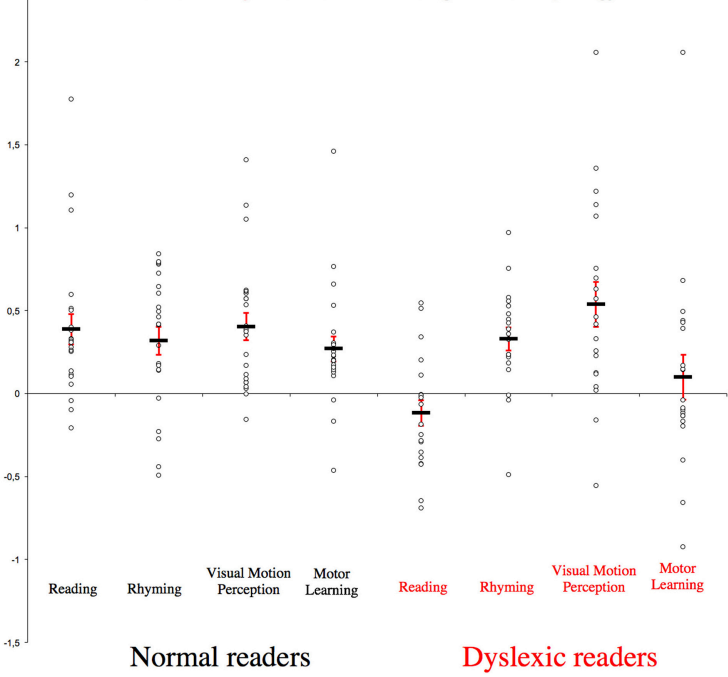

Normal readers > Dyslexic readers for reading. L23 - Inf. temporal gyrus

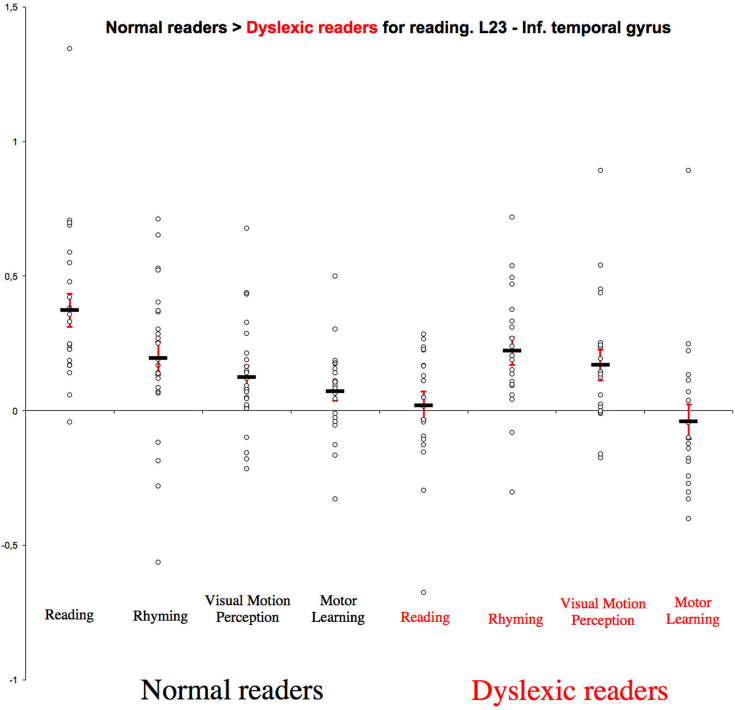

Normal readers > Dyslexic readers for reading. L86 - Mid. temporal gyrus

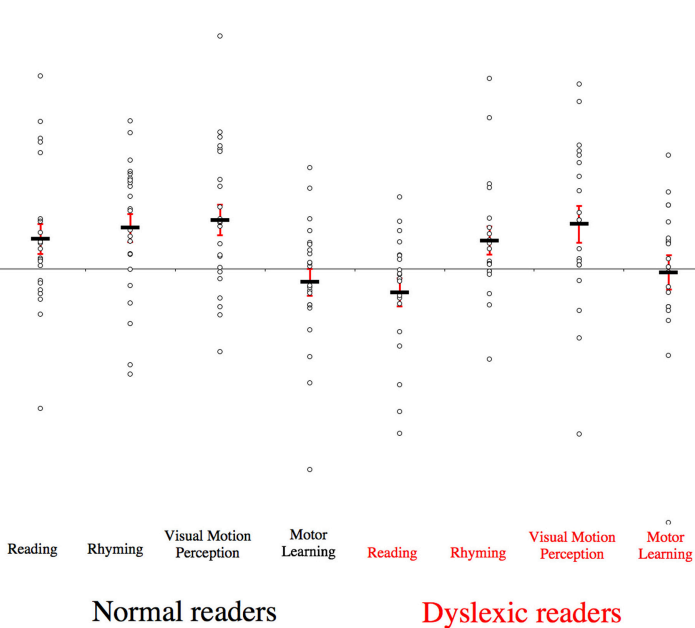

Normal readers > Dyslexic readers for reading. L89 - Supramarginal gyrus

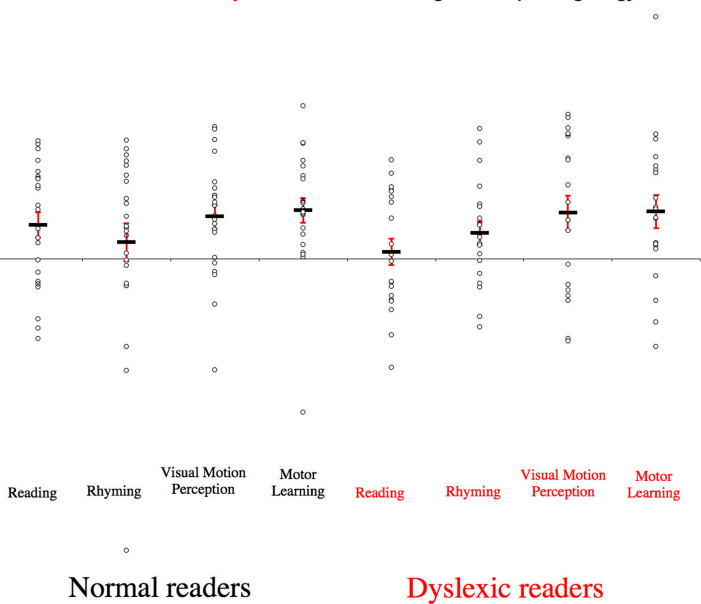

Normal readers

Dyslexic readers



Normal readers > Dyslexic readers for reading. L34 - Sup. parietal lobule

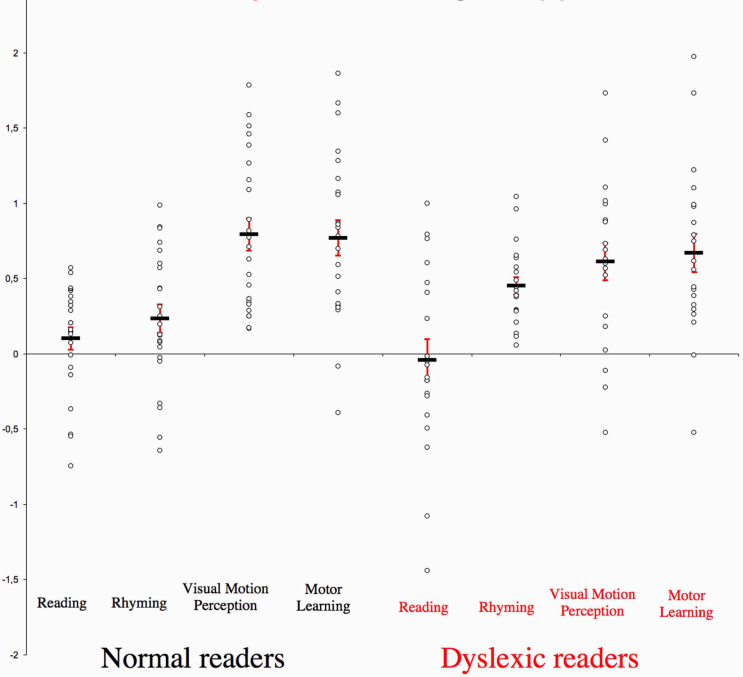

# Normal readers > Dyslexic readers for reading. L30 - Inf. parietal lobule

Reading Rhyming Visual Motion Perception Motor Learning Reading Rhyming Visual Motion Perception Motor Learning

Normal readers

Dyslexic readers

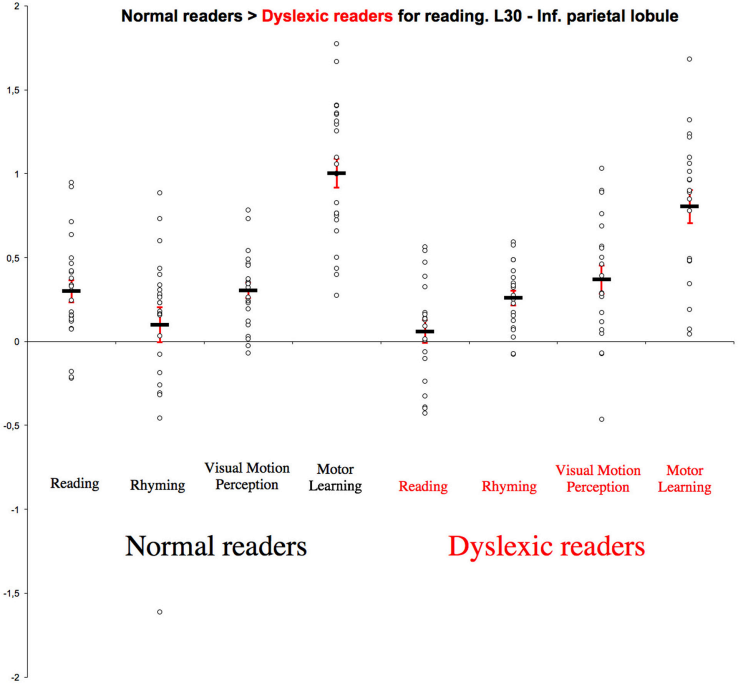

**Normal readers > Dyslexic readers for reading. L38 - Precentral gyrus**

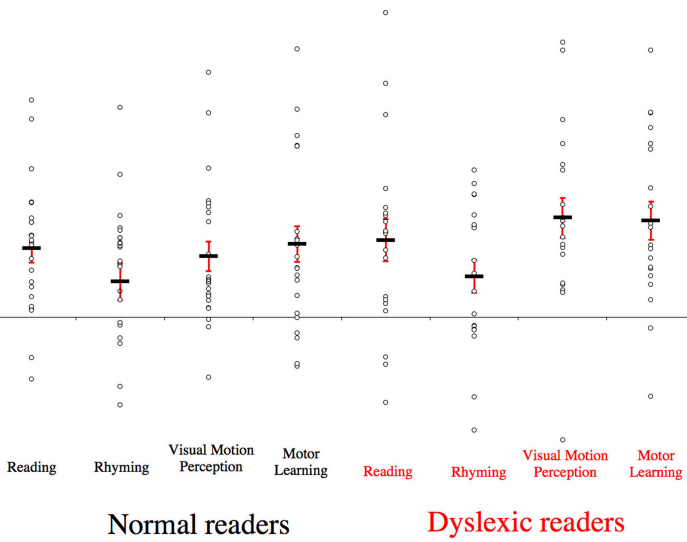

Normal readers

Dyslexic readers

Normal readers > Dyslexic readers for reading. L16 - SMA

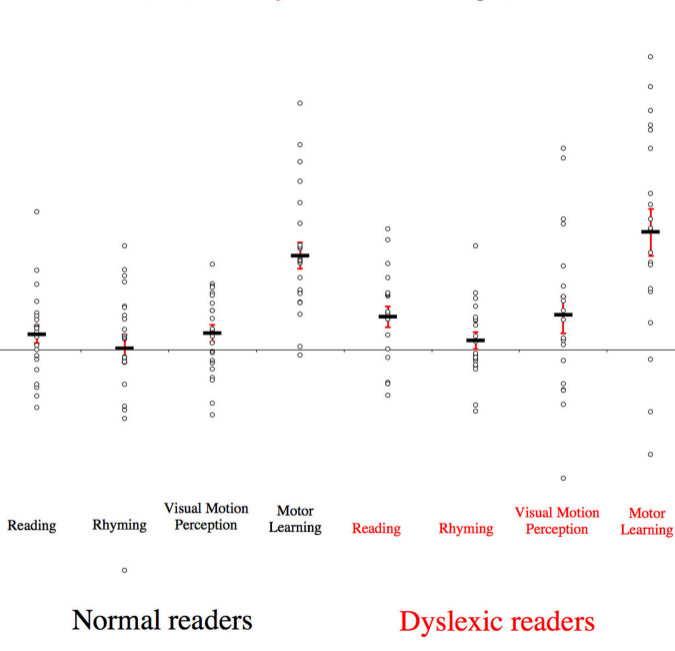

Supplement: NIHMS75236-supplement-Supplementary_Figures.pdf [file NIHMS75236-supplement-Supplementary_Figures.pdf]
